# Supplementary material
Source: PubMed Central journal article supplement (PMC3364744)

**Fig. 1A**

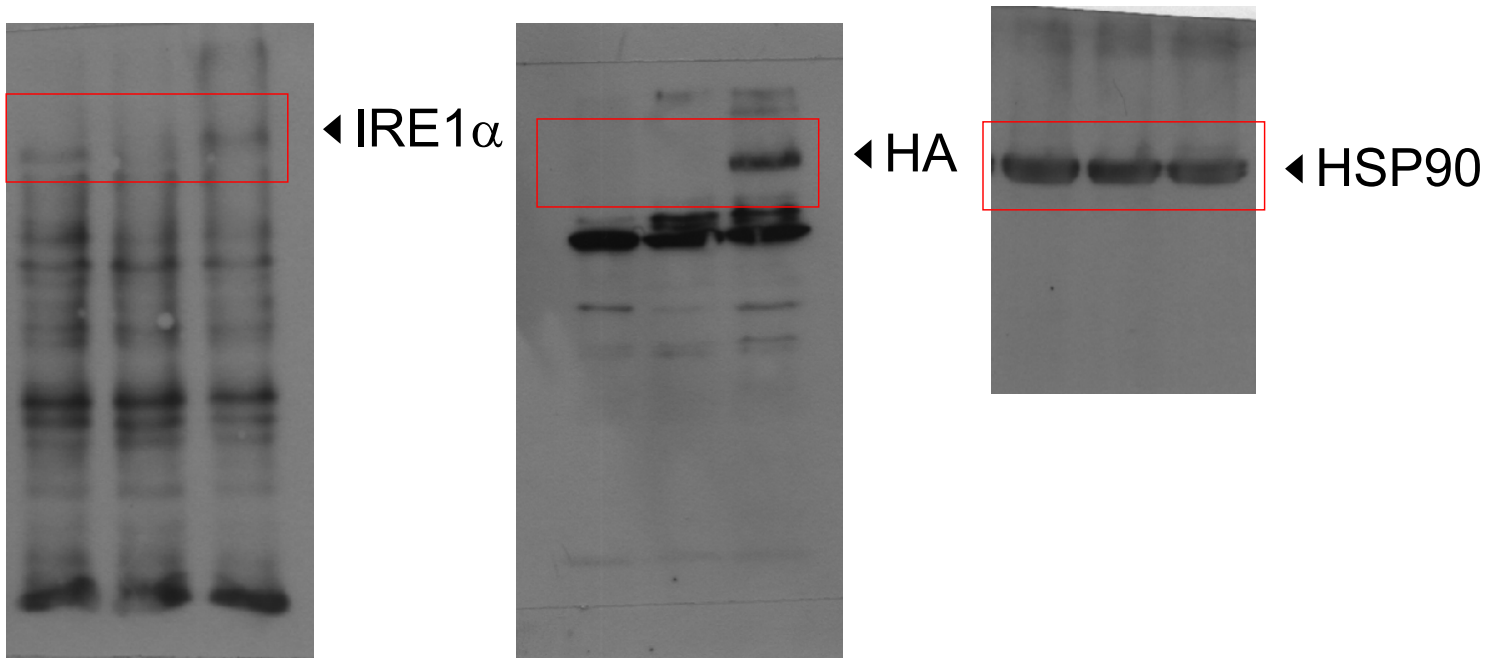

**Fig. 1D**

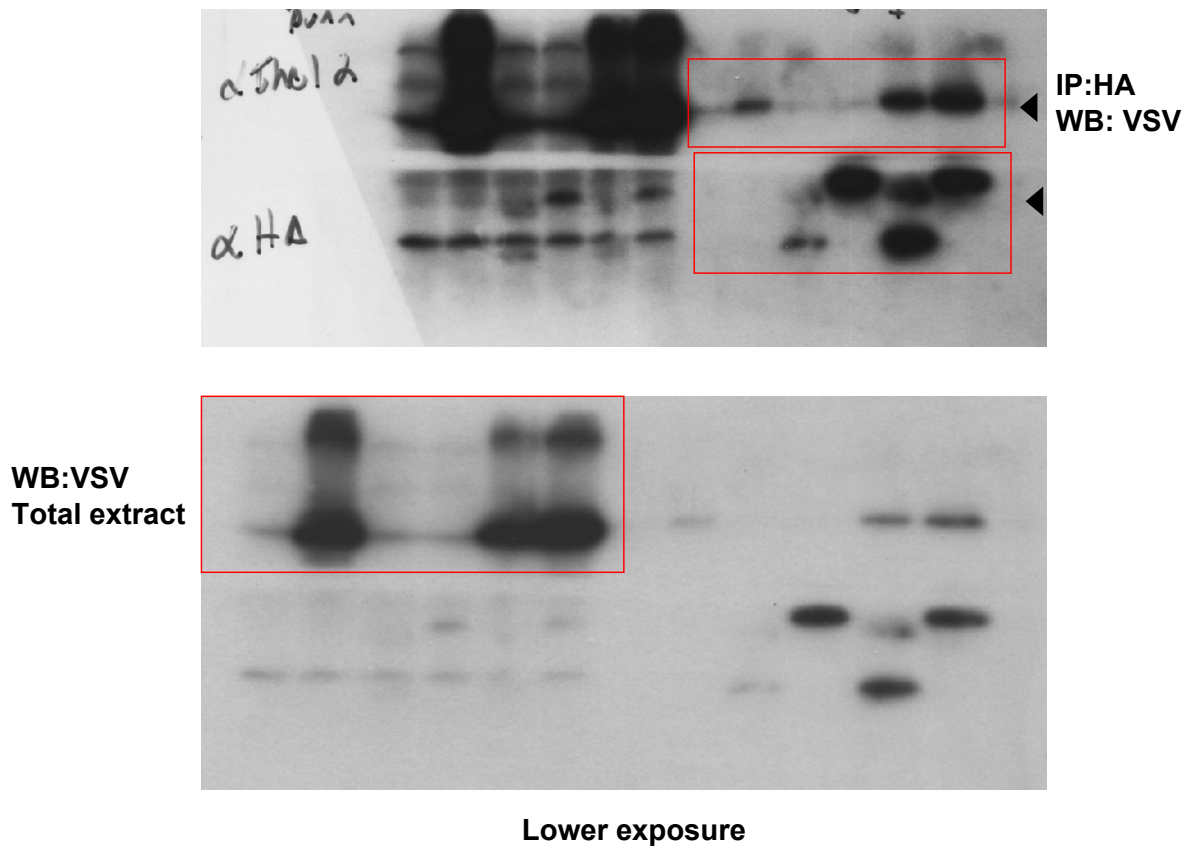

Fig. 1E

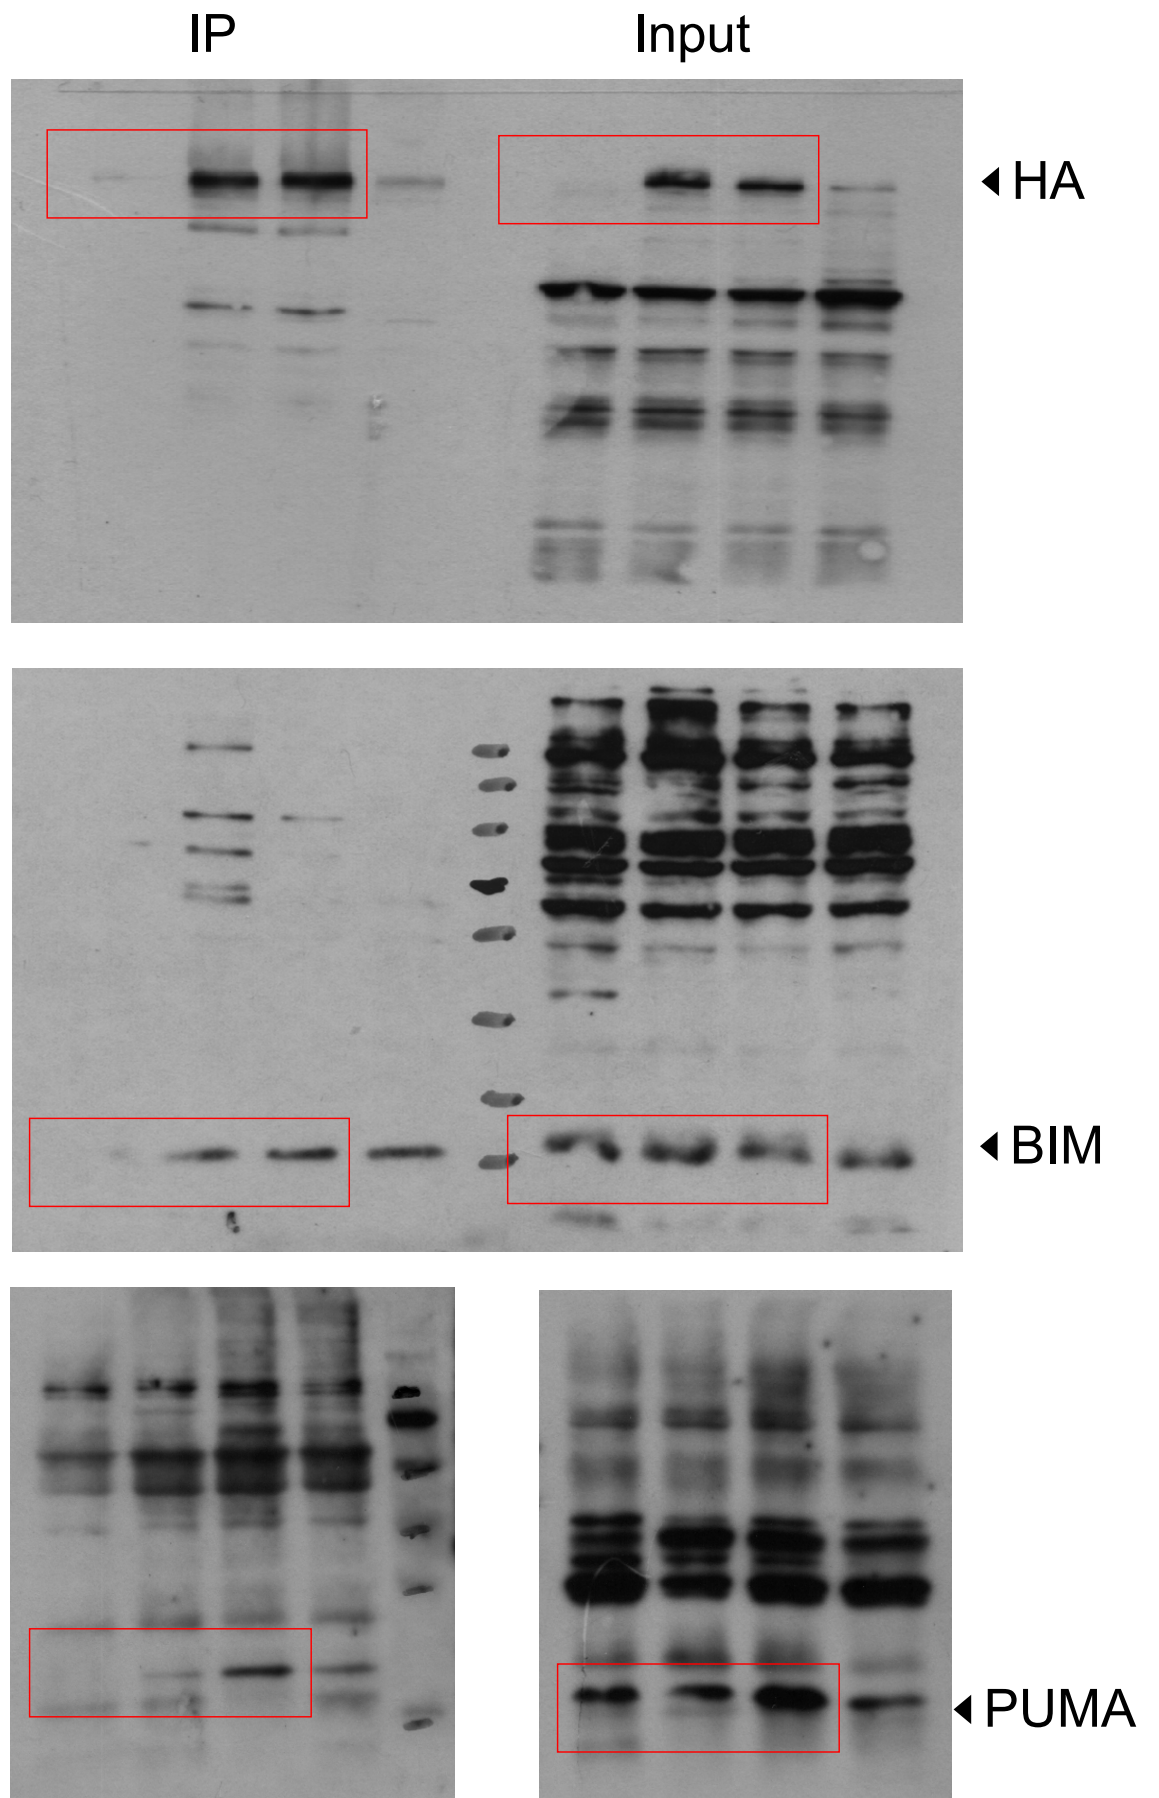

Fig. 1F

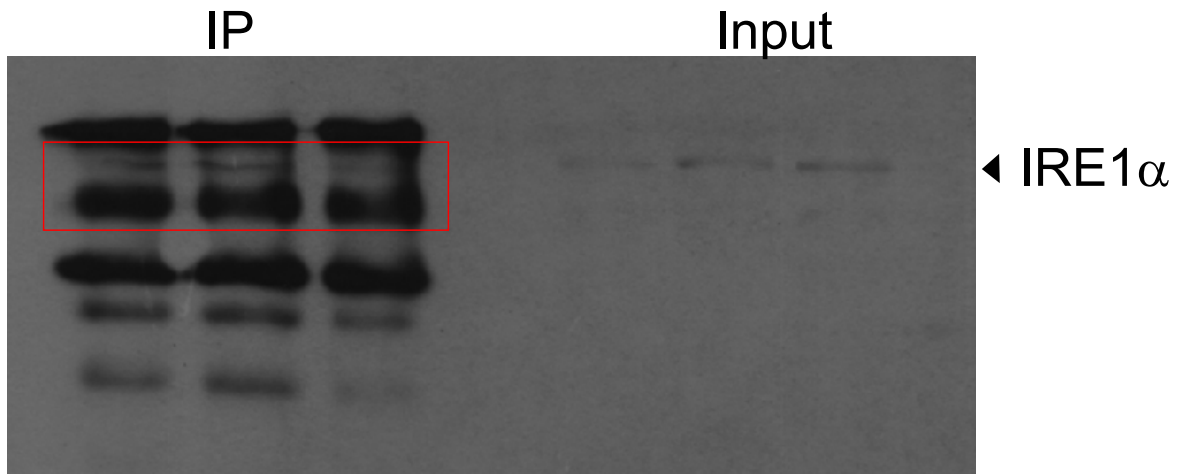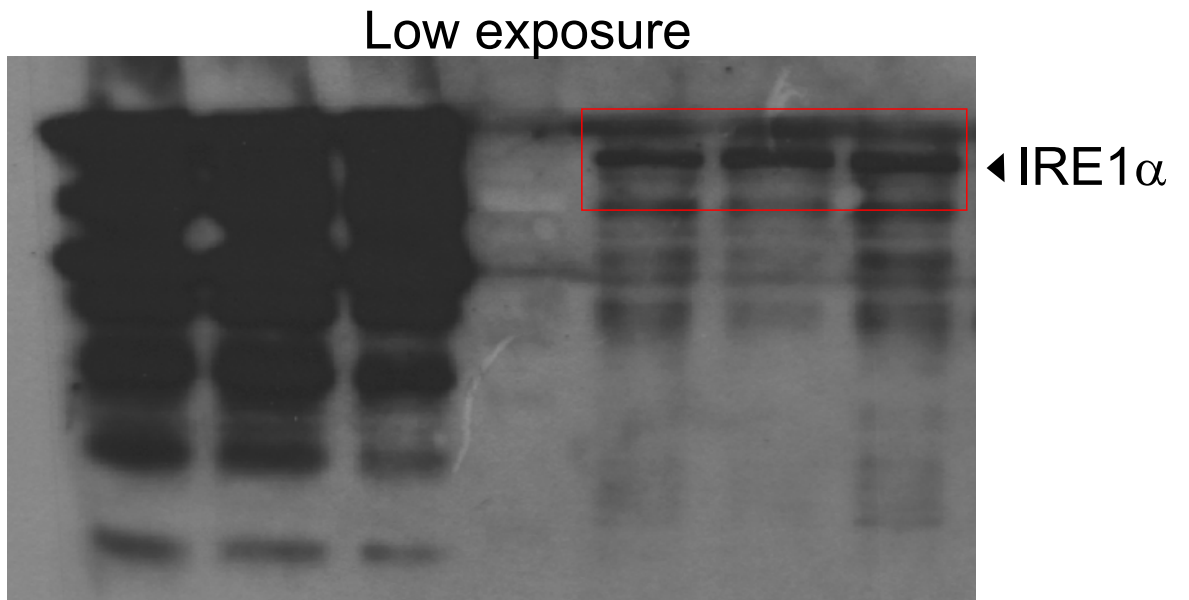

High exposure

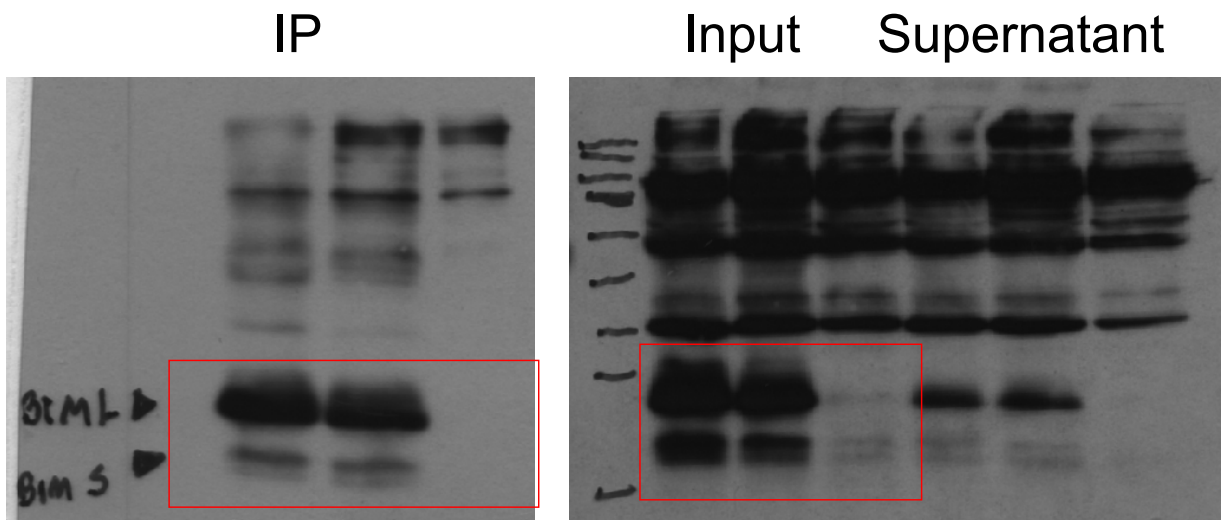

Supplement: emboj201284s2.pdf [file emboj201284s2.pdf]

**Fig. 2A**

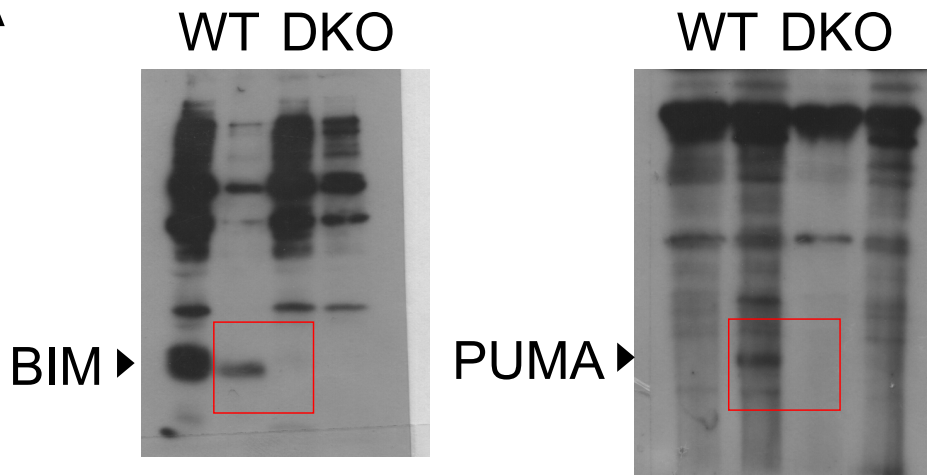

**Fig. 2D**

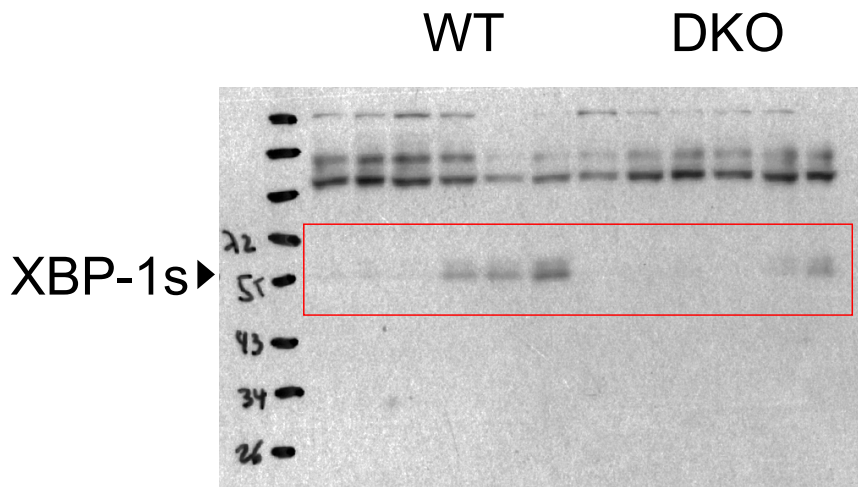

**Fig. 2G**

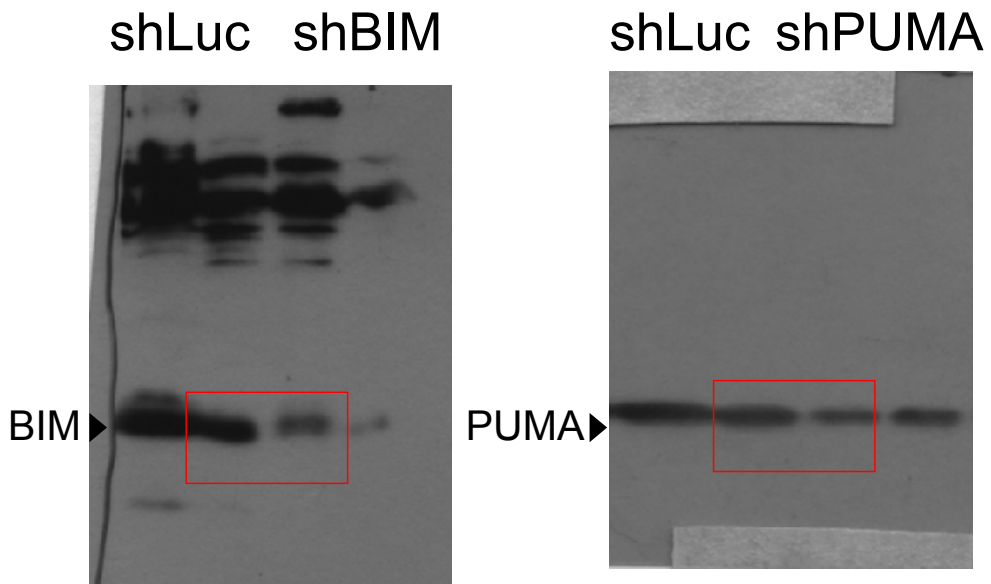

Supplement: emboj201284s3.pdf [file emboj201284s3.pdf]

**Fig. 3D**

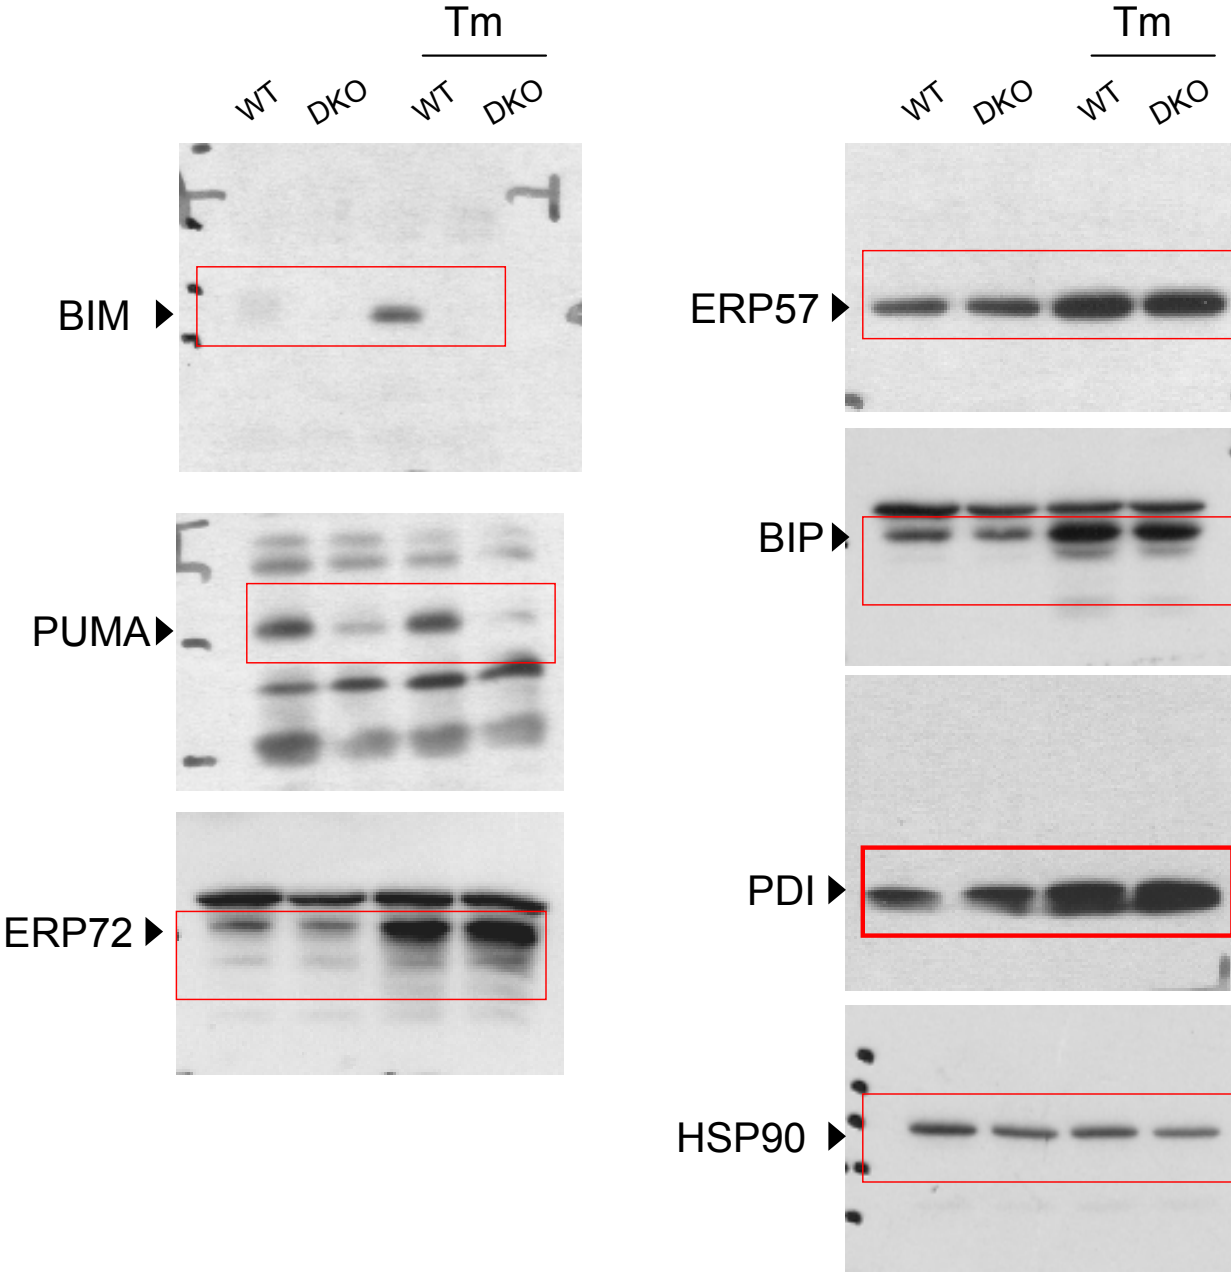

**Fig. 3E**

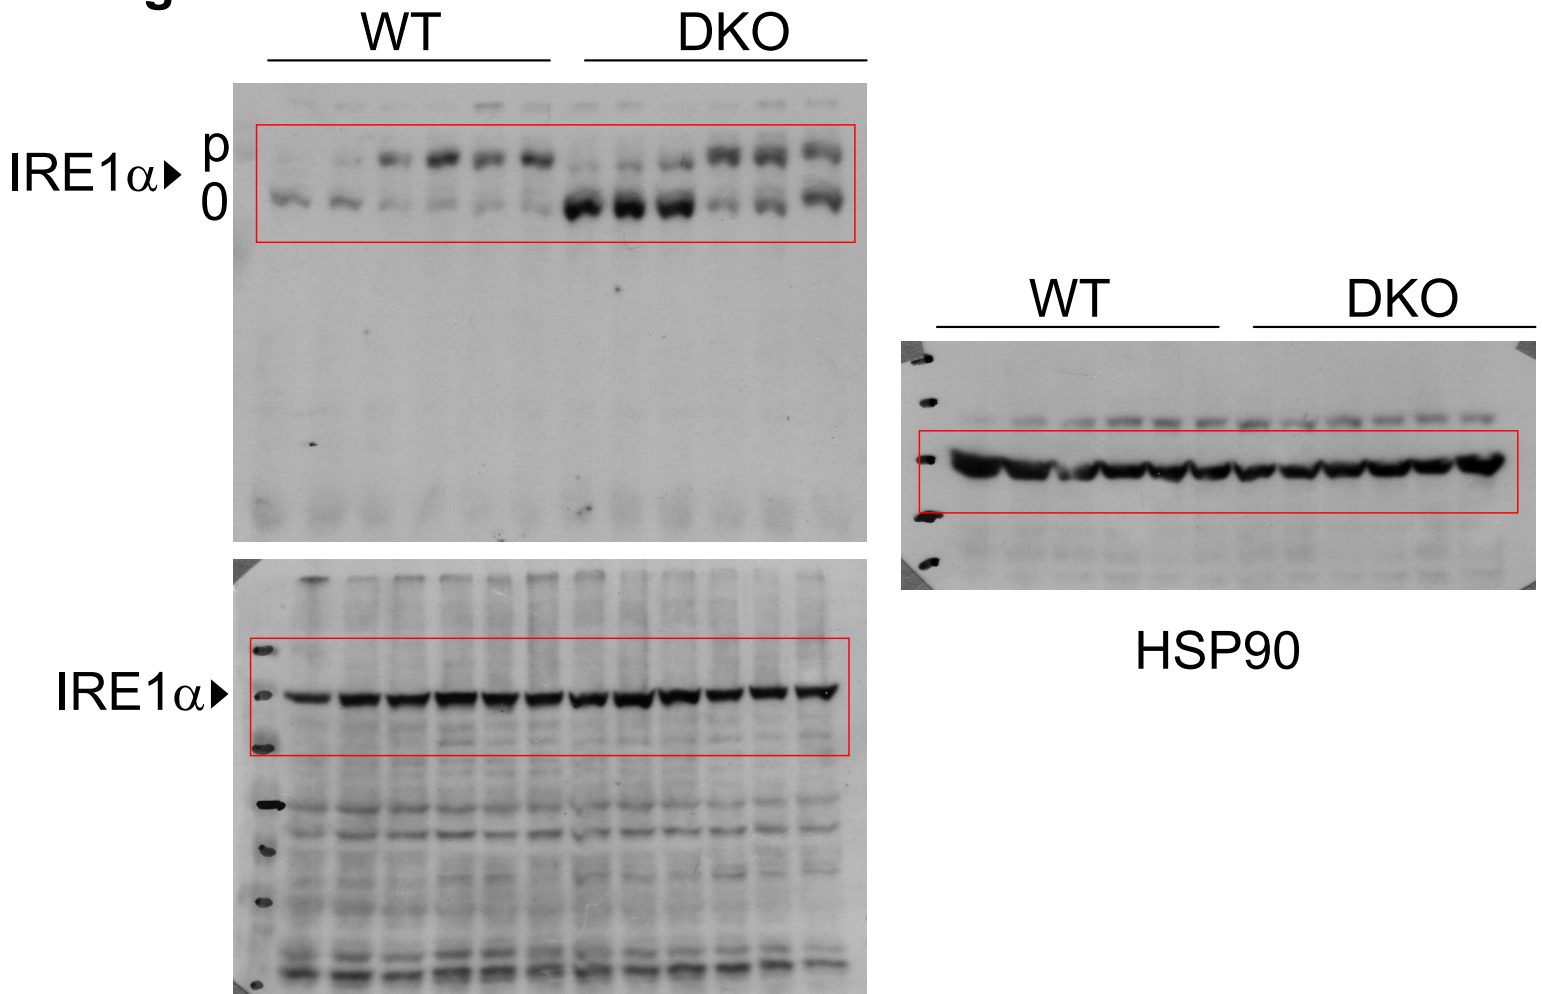

**Fig. 3F**

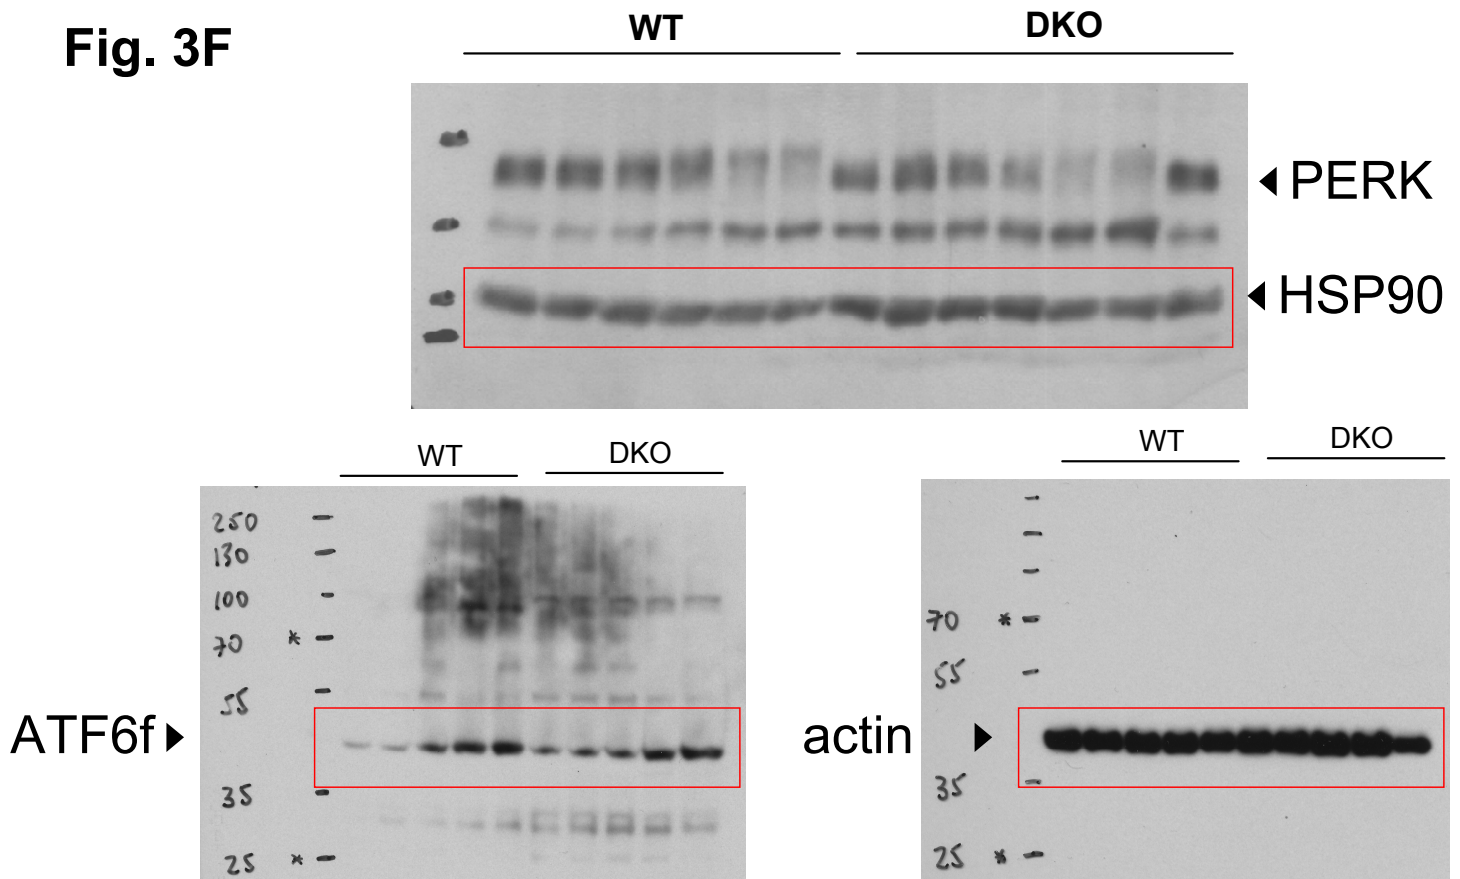

Supplement: emboj201284s4.pdf [file emboj201284s4.pdf]

**Fig. 5A**

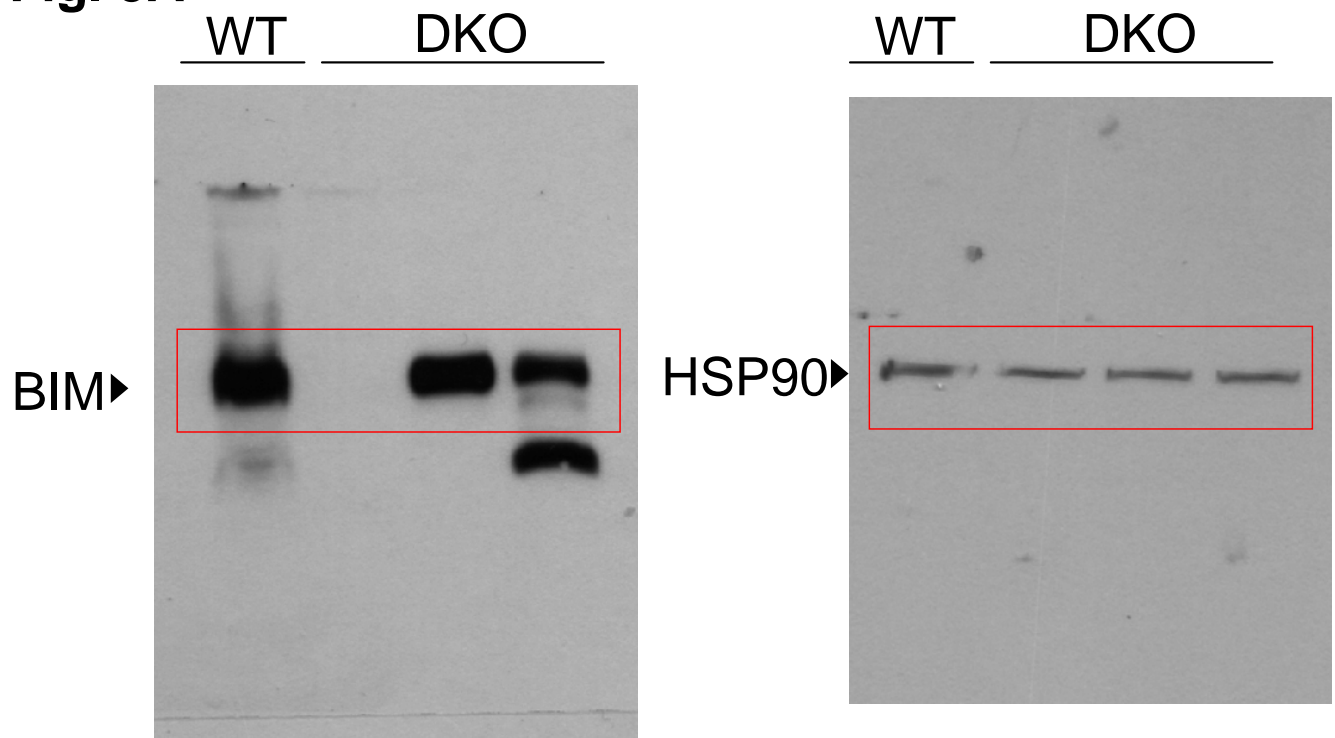

Supplement: emboj201284s5.pdf [file emboj201284s5.pdf]

**Fig. 6C**

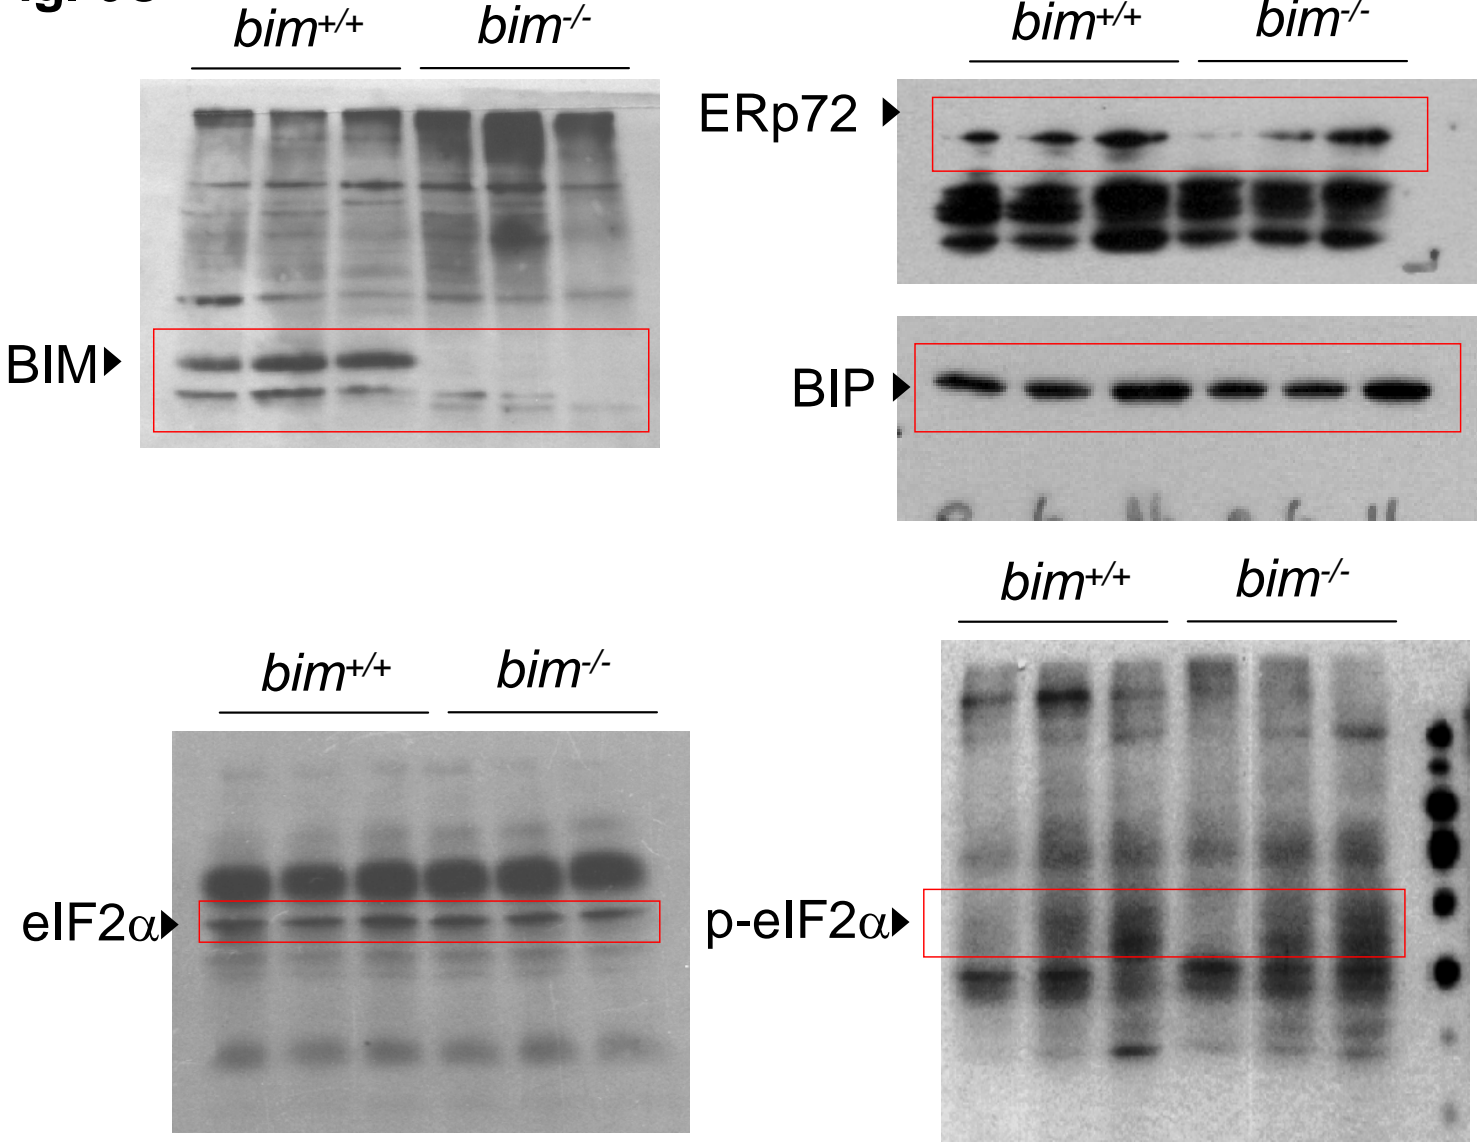

Supplement: emboj201284s6.pdf [file emboj201284s6.pdf]
